# Supplementary material
Source: publisher figshare collection journal article supplement (https://frontiersin.figshare.com/ndownloader/files/23841614)
Supplement: Supplementary file [file 23841614]

## Supplementary Material

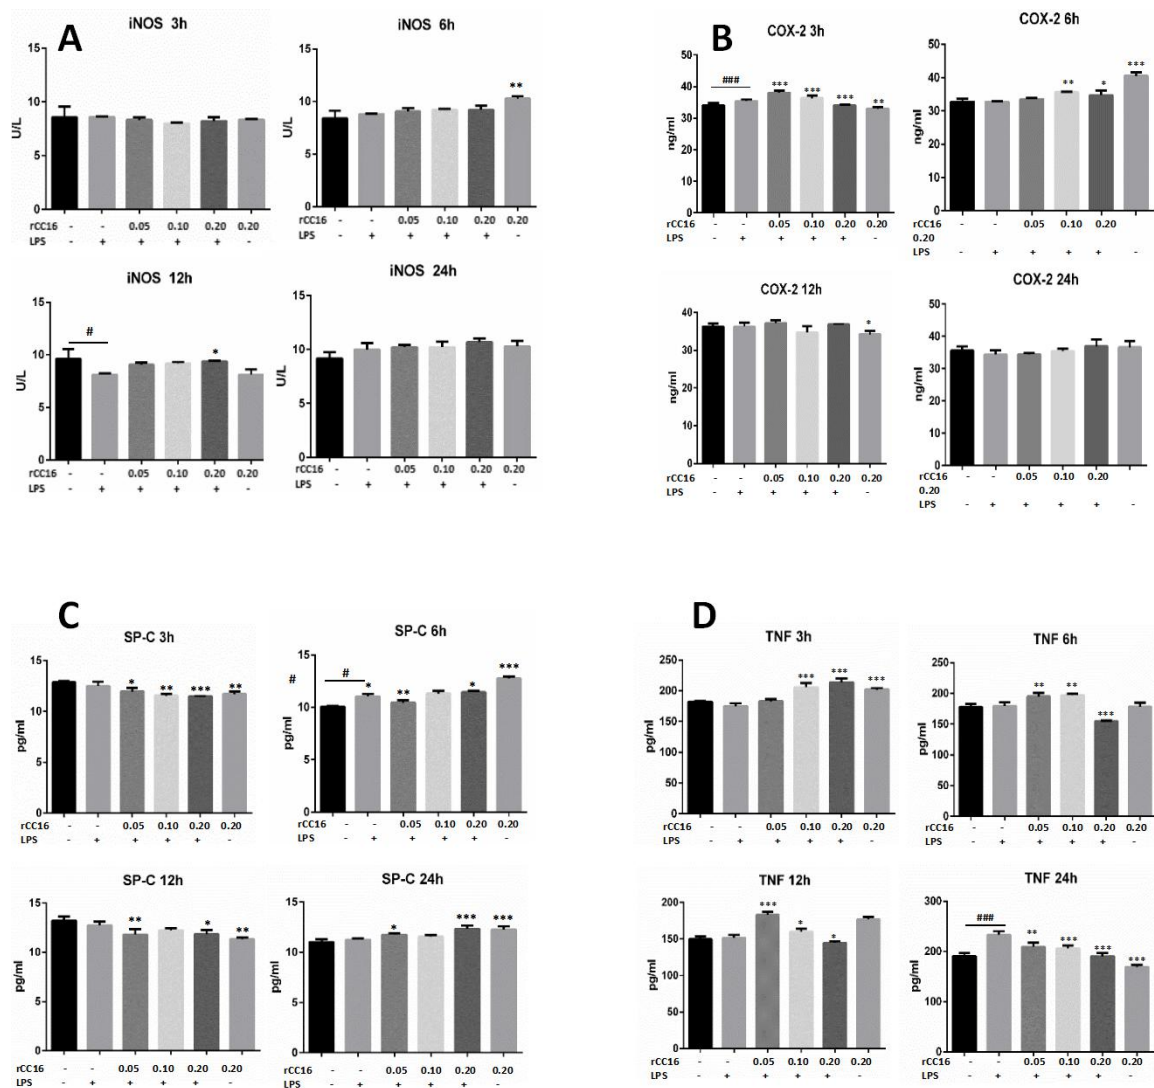

**Figure S1.** Effects of rCC16 on the LPS-stimulated expression of inflammatory cytokines in A549 cells. A549 cells were incubated with rCC16 (0–0.2  $\mu\text{g/mL}$  for 3 h followed by LPS exposure at 200  $\mu\text{g/mL}$  for an additional 24 h. # $p < 0.05$  and ### $p < 0.001$  compared with the control group; \* $p < 0.05$ , \*\* $p < 0.01$ , and \*\*\* $p < 0.001$  compared with the model group. Graphs show the mean  $\pm$  SD of triplicate wells and represent three independent experiments.
